# Supplementary material for: Exome sequencing reveals heterogeneous clonal dynamics in donor cell myeloid neoplasms after stem cell transplantation
Source: PubMed Central journal article supplement — Haematologica. 2020 Feb 20;105(11):2655–8. doi: 10.3324/haematol.2019.234609 (PMC7604628; doi:10.3324/haematol.2019.234609), 2020-02-20
Supplement: 2019_234609-Disclosures_Contributions.pdf [file 2019_234609-Disclosures_Contributions.pdf]

Haematologica  
HAEMATOL/2019/234609  
Version 4

Exome sequencing reveals heterogeneous clonal dynamics in donor cell myeloid neoplasms after stem cell transplantation

Julia Suárez-González, Juan Carlos Triviño, Guiomar Bautista, José Antonio García-Marco, Ángela Figuera, Antonio Balas, José Luis Vicario, Francisco José Ortuño, Raúl Teruel, José María Álamo, Diego Carbonell, Cristina Andrés-Zayas, Nieves Dorado, Gabriela Rodríguez-Macías, Mi Kwon, José Luis Díez-Martín, Carolina Martínez-Laperche, and Ismael Buño

Collaborative Groups: Spanish Group for Hematopoietic Transplantation (GETH))

Disclosures: The authors have nothing to disclose

Contributions: J.S-G., C.M-L. and I.B. were responsible for conception and design; G.B., JA.G-M., A.F., A.B., J.L.V., F.J.O., R.T., J.M.A., M.K., G.R-M., N.D. and J.L.D-M provided patients and samples; J.S-G., J.C.T., G.B., F.J.O., DC, CA-Z, C.M-L. and I.B. collected and assembled data; J.S-G., J.C.T., M.K., DC, CA-Z, J.L.D-M., C.M.-L. and I.B. were responsible for data analysis and interpretation; J.S-G., C.M.-L., and I.B. wrote the manuscript; and all authors gave final approval of the manuscript and are accountable for all aspects of the work.
